# Supplementary material
Source: MDPI journal article supplement (https://www.mdpi.com/2073-4441/14/7/1126)
Supplement: s1 [file s1]

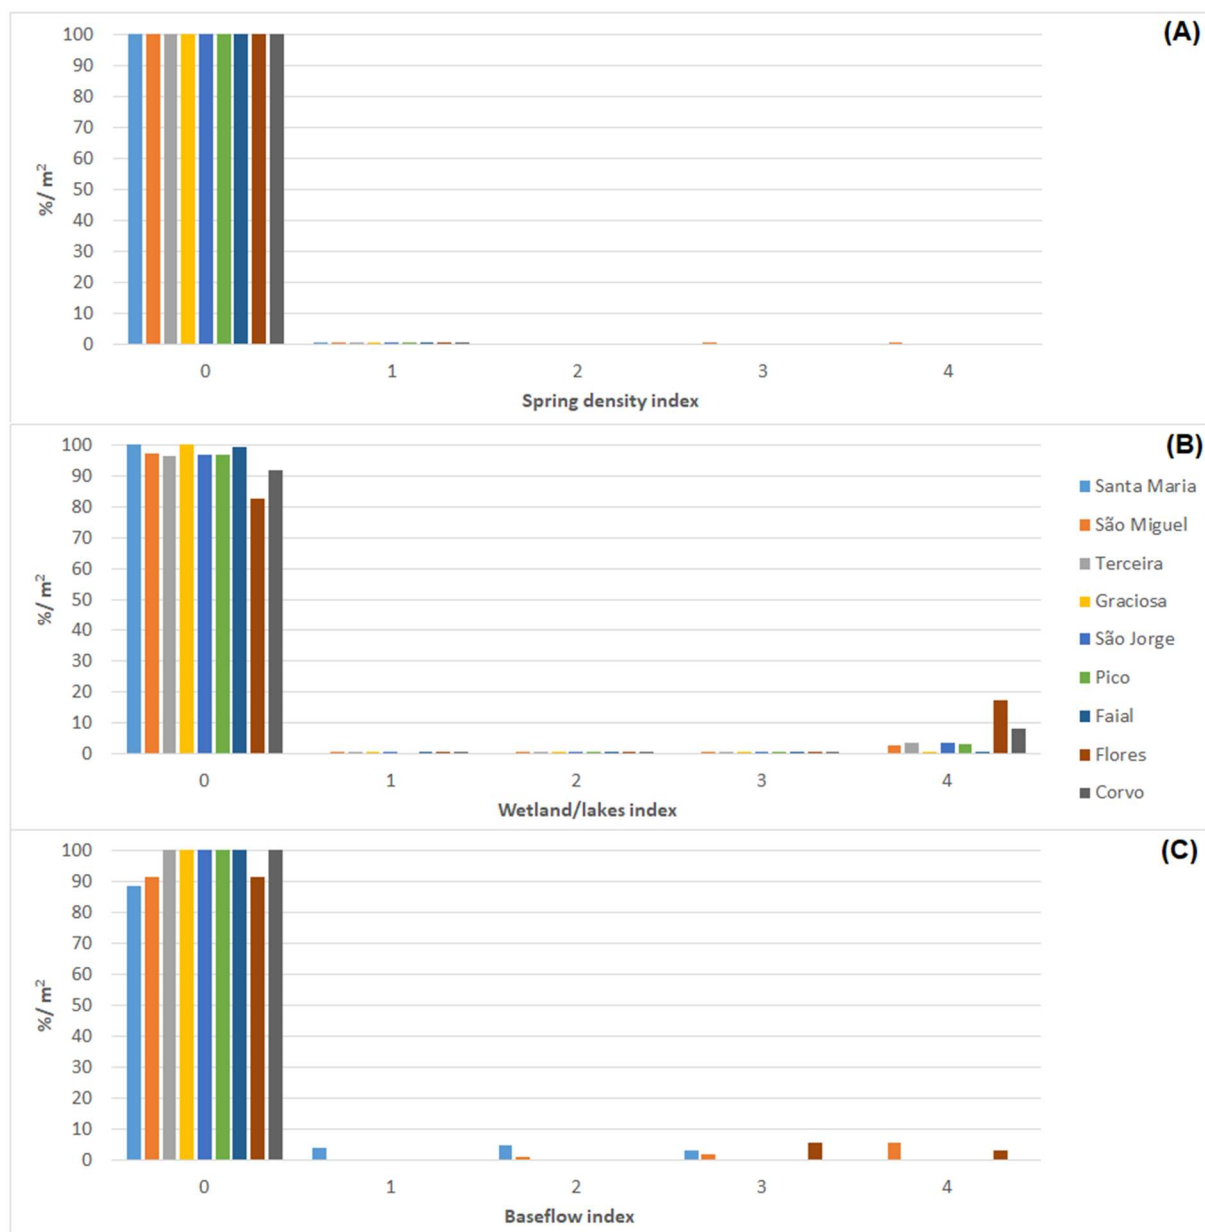

**Figure S1.** Histograms of the territorial expression of the variables (by classes) that make up the ecosystem dependence index in the Azores archipelago as function of the fraction of the area of each island (A – spring density; B – wetlands/lakes; C – baseflow).
