# Supplementary material
Source: MDPI journal article supplement (https://www.mdpi.com/2073-4441/14/7/1126)
Supplement: s1 [file s1 › Table S1.pdf]

**Table S1.** Territorial expression of the ecosystem dependence index (by classes) in the Azores archipelago as function of the fraction of the area of each island.

| Island      | Index | Territorial expression  |                  |
|-------------|-------|-------------------------|------------------|
|             |       | Area (km <sup>2</sup> ) | %/m <sup>2</sup> |
| Santa Maria | 0     | 85.70                   | 88.47            |
|             | 1     | 8.38                    | 8.64             |
|             | 2     | 2.80                    | 2.89             |
|             | 3     | 0.00                    | 0.00             |
|             | 4     | 0.00                    | 0.00             |
| São Miguel  | 0     | 665.63                  | 89.40            |
|             | 1     | 6.04                    | 0.81             |
|             | 2     | 68.63                   | 9.21             |
|             | 3     | 4.26                    | 0.57             |
|             | 4     | <0.01                   | <0.01            |
| Terceira    | 0     | 386.13                  | 96.46            |
|             | 1     | 0.03                    | 0.01             |
|             | 2     | 14.13                   | 3.53             |
|             | 3     | <0.01                   | <0.01            |
|             | 4     | 0.00                    | 0.00             |
| Graciosa    | 0     | 60.64                   | 99.98            |
|             | 1     | <0.01                   | <0.01            |
|             | 2     | 0.01                    | 0.02             |
|             | 3     | 0.00                    | 0.00             |
|             | 4     | 0.00                    | 0.00             |
| São Jorge   | 0     | 235.48                  | 96.65            |
|             | 1     | 0.09                    | 0.03             |
|             | 2     | 8.08                    | 3.31             |

|               |          |        |       |
|---------------|----------|--------|-------|
|               | <b>3</b> | <0.01  | <0.01 |
|               | <b>4</b> | 0.00   | 0.00  |
| <b>Pico</b>   | <b>0</b> | 431.64 | 96.99 |
|               | <b>1</b> | 0.01   | <0.01 |
|               | <b>2</b> | 13.34  | 3.00  |
|               | <b>3</b> | <0.01  | <0.01 |
|               | <b>4</b> | 0.00   | 0.00  |
| <b>Faial</b>  | <b>0</b> | 171.98 | 99.38 |
|               | <b>1</b> | 0.03   | 0.02  |
|               | <b>2</b> | 1.03   | 0.60  |
|               | <b>3</b> | 0.00   | 0.00  |
|               | <b>4</b> | 0.00   | 0.00  |
| <b>Flores</b> | <b>0</b> | 109.02 | 77.34 |
|               | <b>1</b> | 0.01   | 0.01  |
|               | <b>2</b> | 27.12  | 19.24 |
|               | <b>3</b> | 4.81   | 3.41  |
|               | <b>4</b> | 0.00   | 0.00  |
| <b>Corvo</b>  | <b>0</b> | 15.72  | 91.86 |
|               | <b>1</b> | <0.01  | 0.01  |
|               | <b>2</b> | 1.39   | 8.13  |
|               | <b>3</b> | 0.00   | 0.00  |
|               | <b>4</b> | 0.00   | 0.00  |
